# Supplementary material for: Molecular Subtyping Based on Cuproptosis-Related Genes and Characterization of Tumor Microenvironment Infiltration in Kidney Renal Clear Cell Carcinoma
Source: PubMed Central journal article supplement (PMC9299088; doi:10.3389/fonc.2022.919083), 2022-07-06
Supplement: Image_1.pdf [file Image_1.pdf]

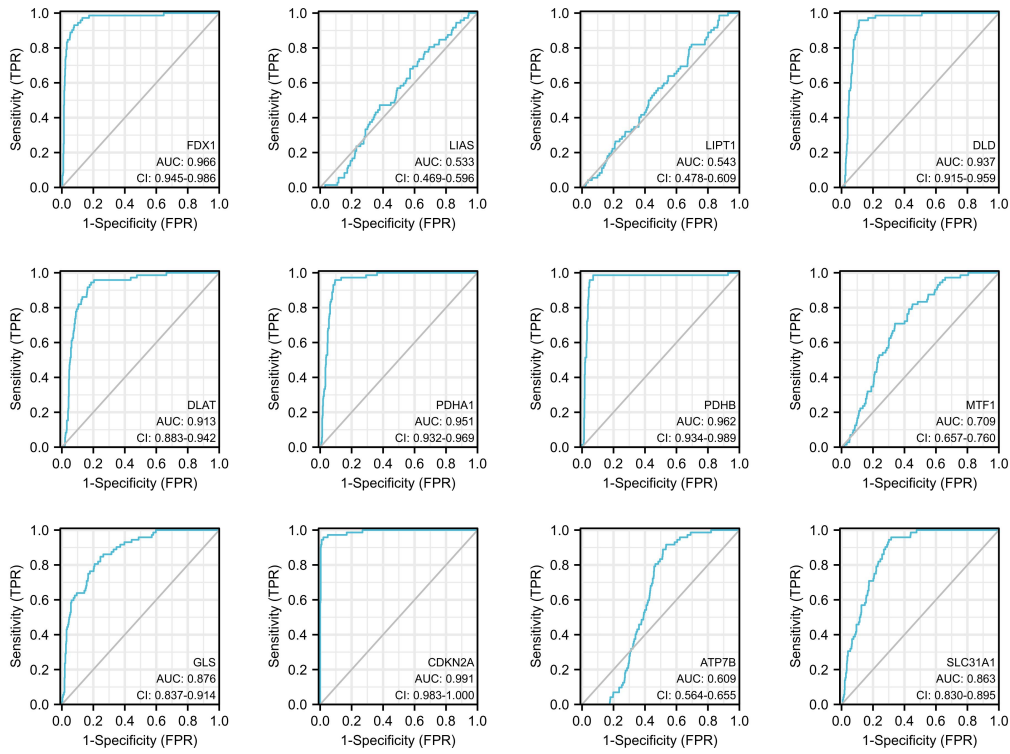

Fig.S1.1 Results of ROC analysis of 12 CRGs in KIRC.

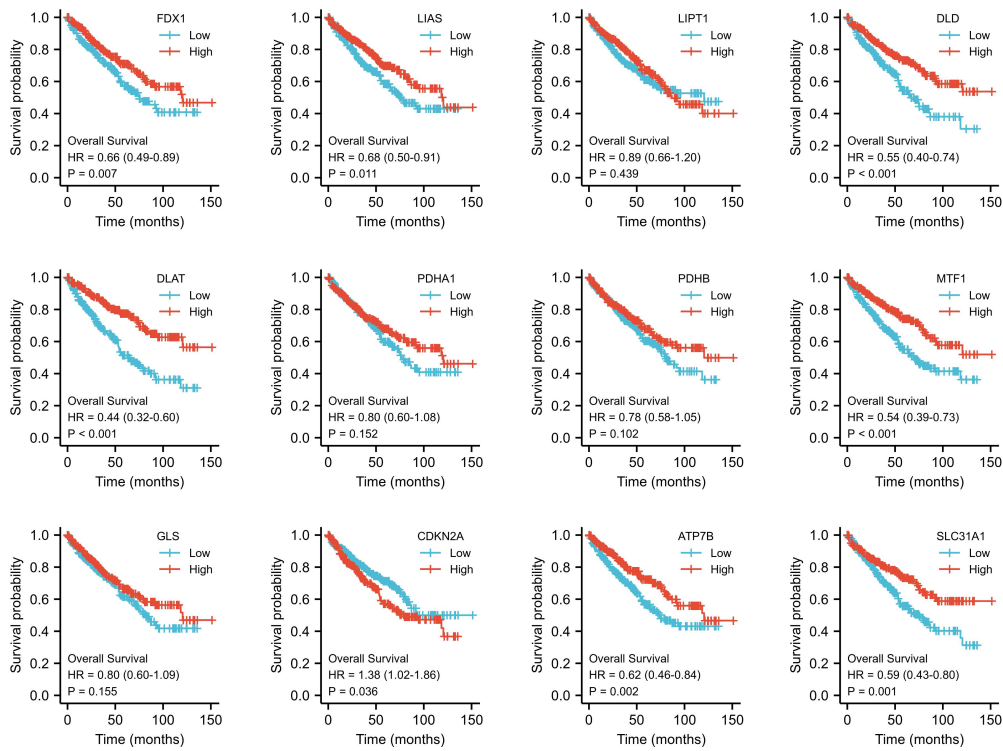

Fig.S1.2 Results of KM analysis of 12 CRGs in KIRC.

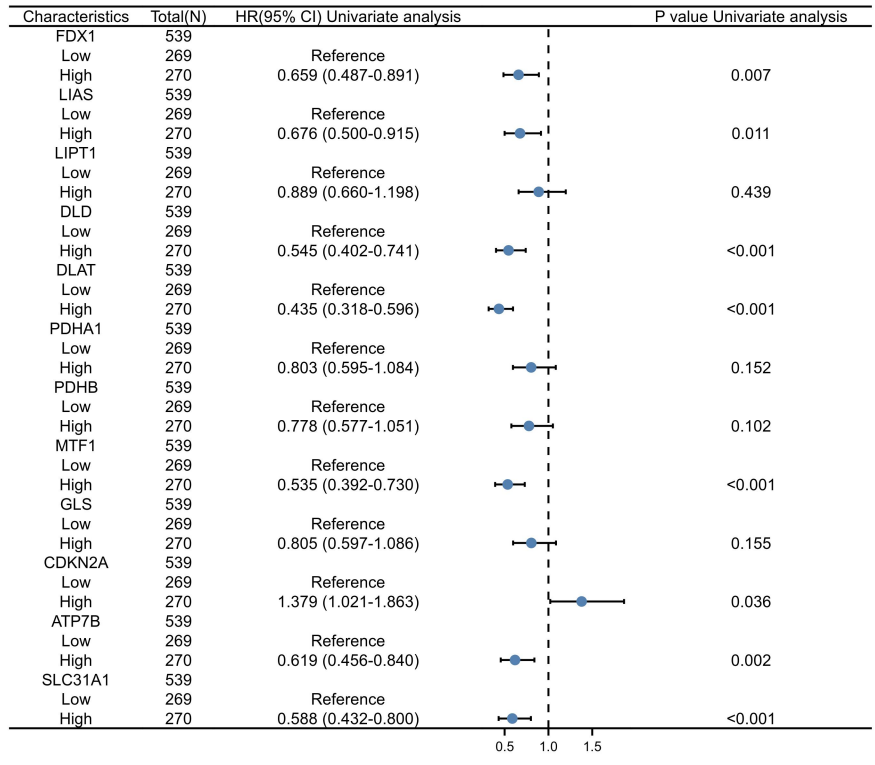

Fig.S1.3 Results of univariate Cox regression analysis of 12 CRGS in KIRC.
