# Supplementary material for: Molecular Subtyping Based on Cuproptosis-Related Genes and Characterization of Tumor Microenvironment Infiltration in Kidney Renal Clear Cell Carcinoma
Source: PubMed Central journal article supplement (PMC9299088; doi:10.3389/fonc.2022.919083), 2022-07-06
Supplement: Image_4.pdf [file Image_4.pdf]

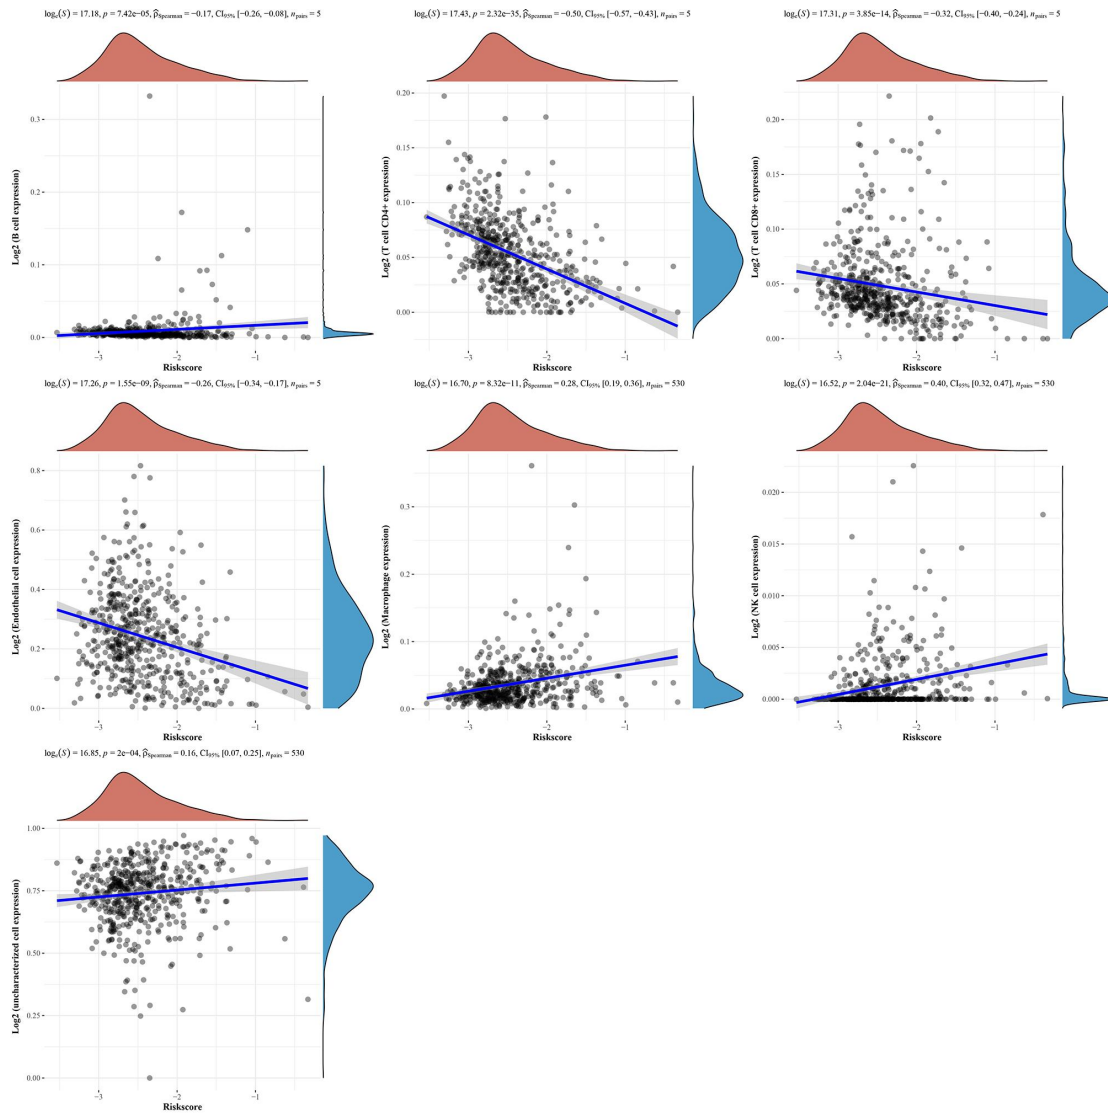

Fig.S4.1 The correlation of CRG\_score with immune cells was analyzed using EPIC

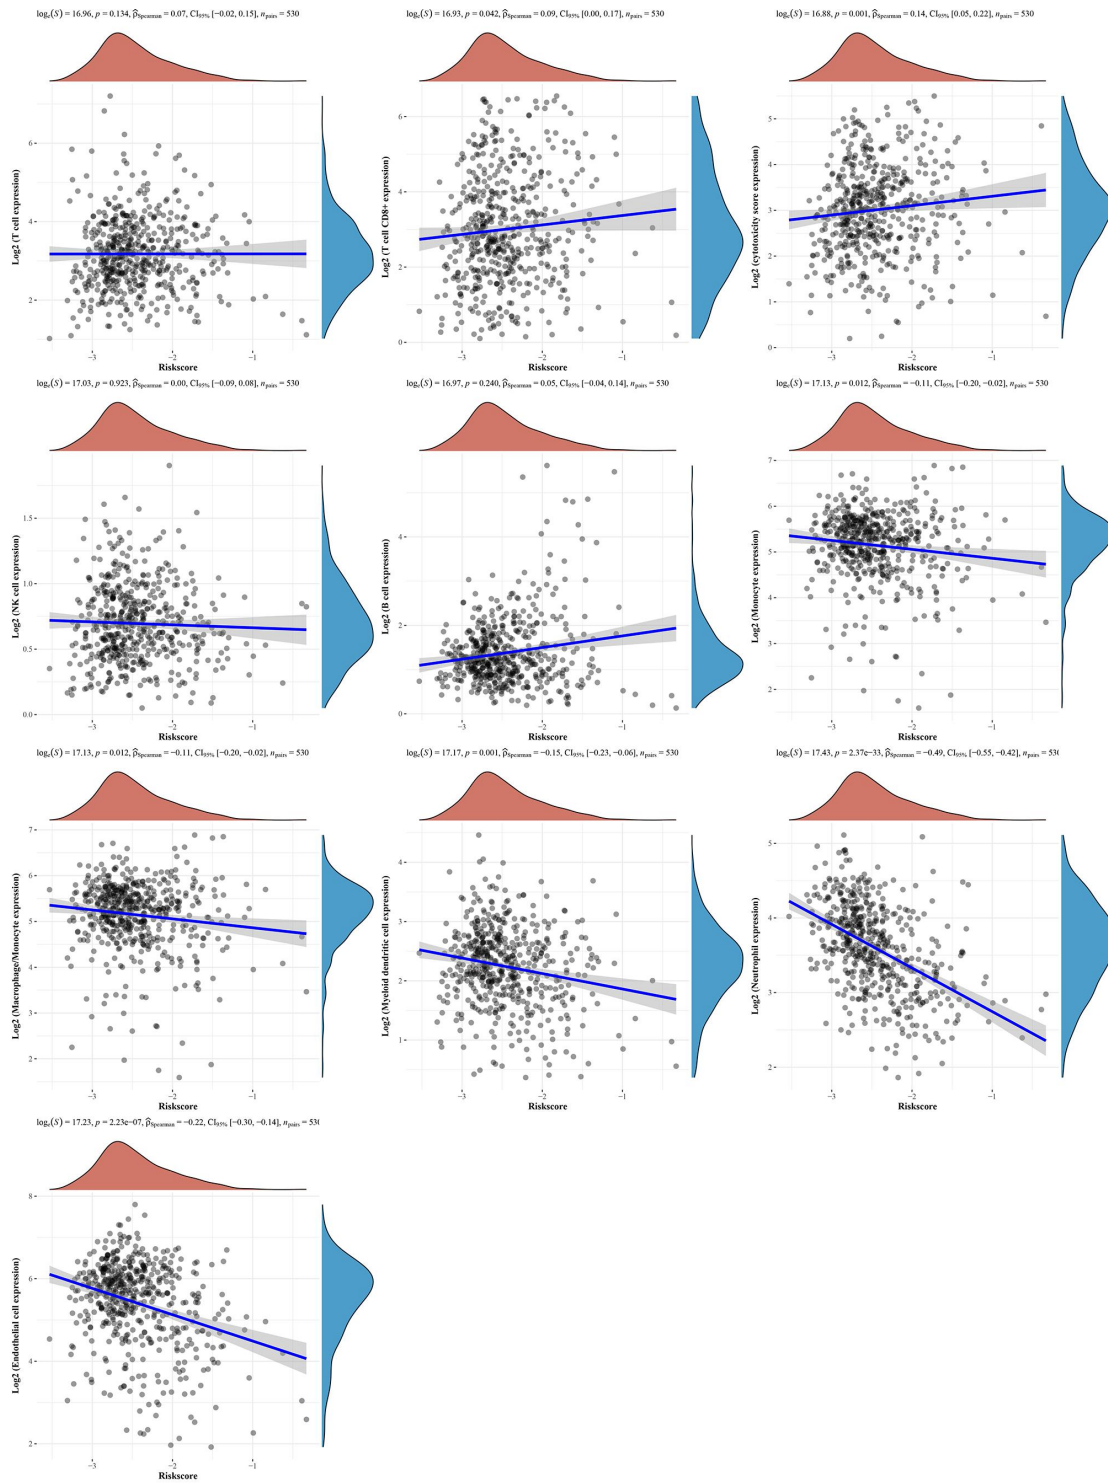

Fig.S4.2 The correlation of CRG\_score with immune cells was analyzed using MCP-COUNTER

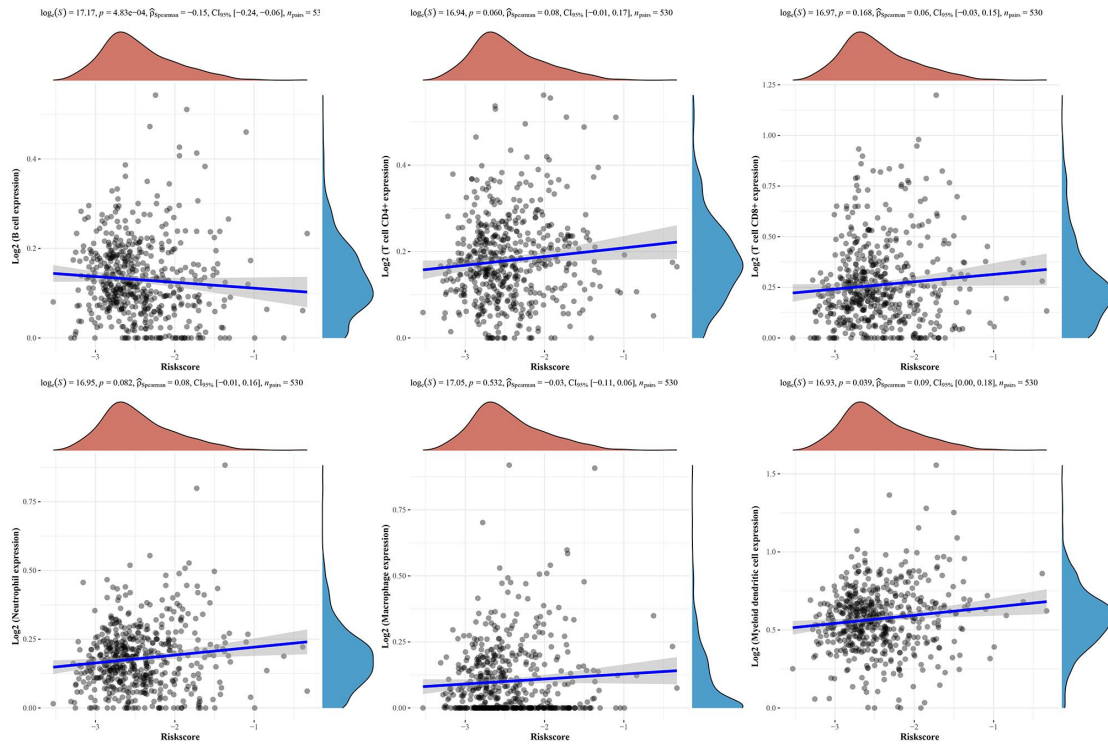

Fig.S4.3 The correlation of CRG\_score with immune cells was analyzed using TIMER
